# Supplementary material for: Effects of environmental factors on nitrofurantoin photolysis in water and its acute toxicity assessment
Source: Royal Society of Chemistry journal article supplement (doi:10.1039/d1em00133g), 2021-01-01
Supplement: d1em00133g1.pdf [file d1em00133g1.pdf]

## Supplementary materials

### Effects of environmental factors on nitrofurantoin photolysis in water and its acute toxicity assessment

Martina Biošić<sup>1\*</sup>, Dario Dabić<sup>1</sup>, Irena Škorić<sup>2</sup>, Sandra Babić<sup>1</sup>

*<sup>1</sup>Department of Analytical Chemistry, Faculty of Chemical Engineering and Technology,  
University of Zagreb, 10000 Zagreb, Croatia*

*<sup>2</sup>Department of Organic Chemistry, Faculty of Chemical Engineering and Technology,  
University of Zagreb, 10000 Zagreb, Croatia*

\*To whom correspondence should be addressed.

Department of Analytical Chemistry, Faculty of Chemical Engineering and Technology,  
University of Zagreb, Marulićev trg 19, 10000 Zagreb, Croatia

Tel: +385 1 4597 203; Fax: +385 1 4597 250; e-mail: [mperisa@fkit.hr](mailto:mperisa@fkit.hr)

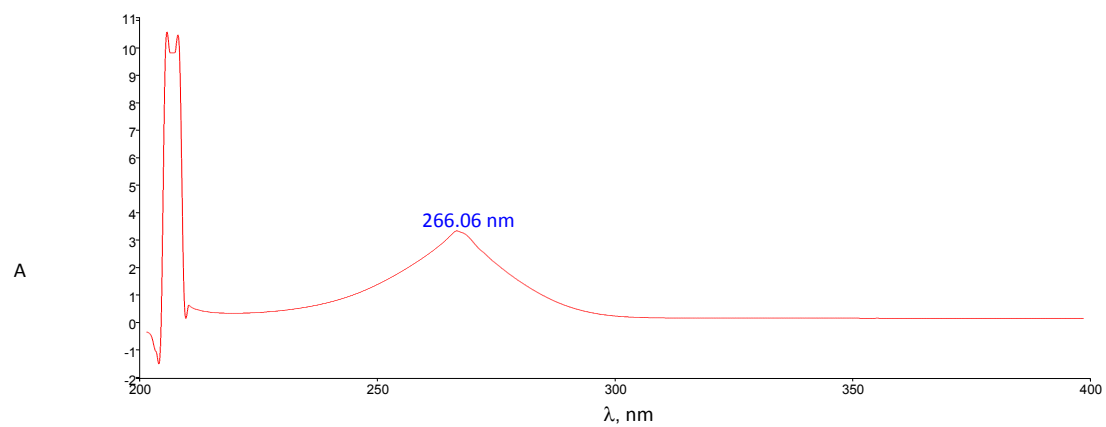

**Fig. S1** UV absorption spectra of ascorbic acid

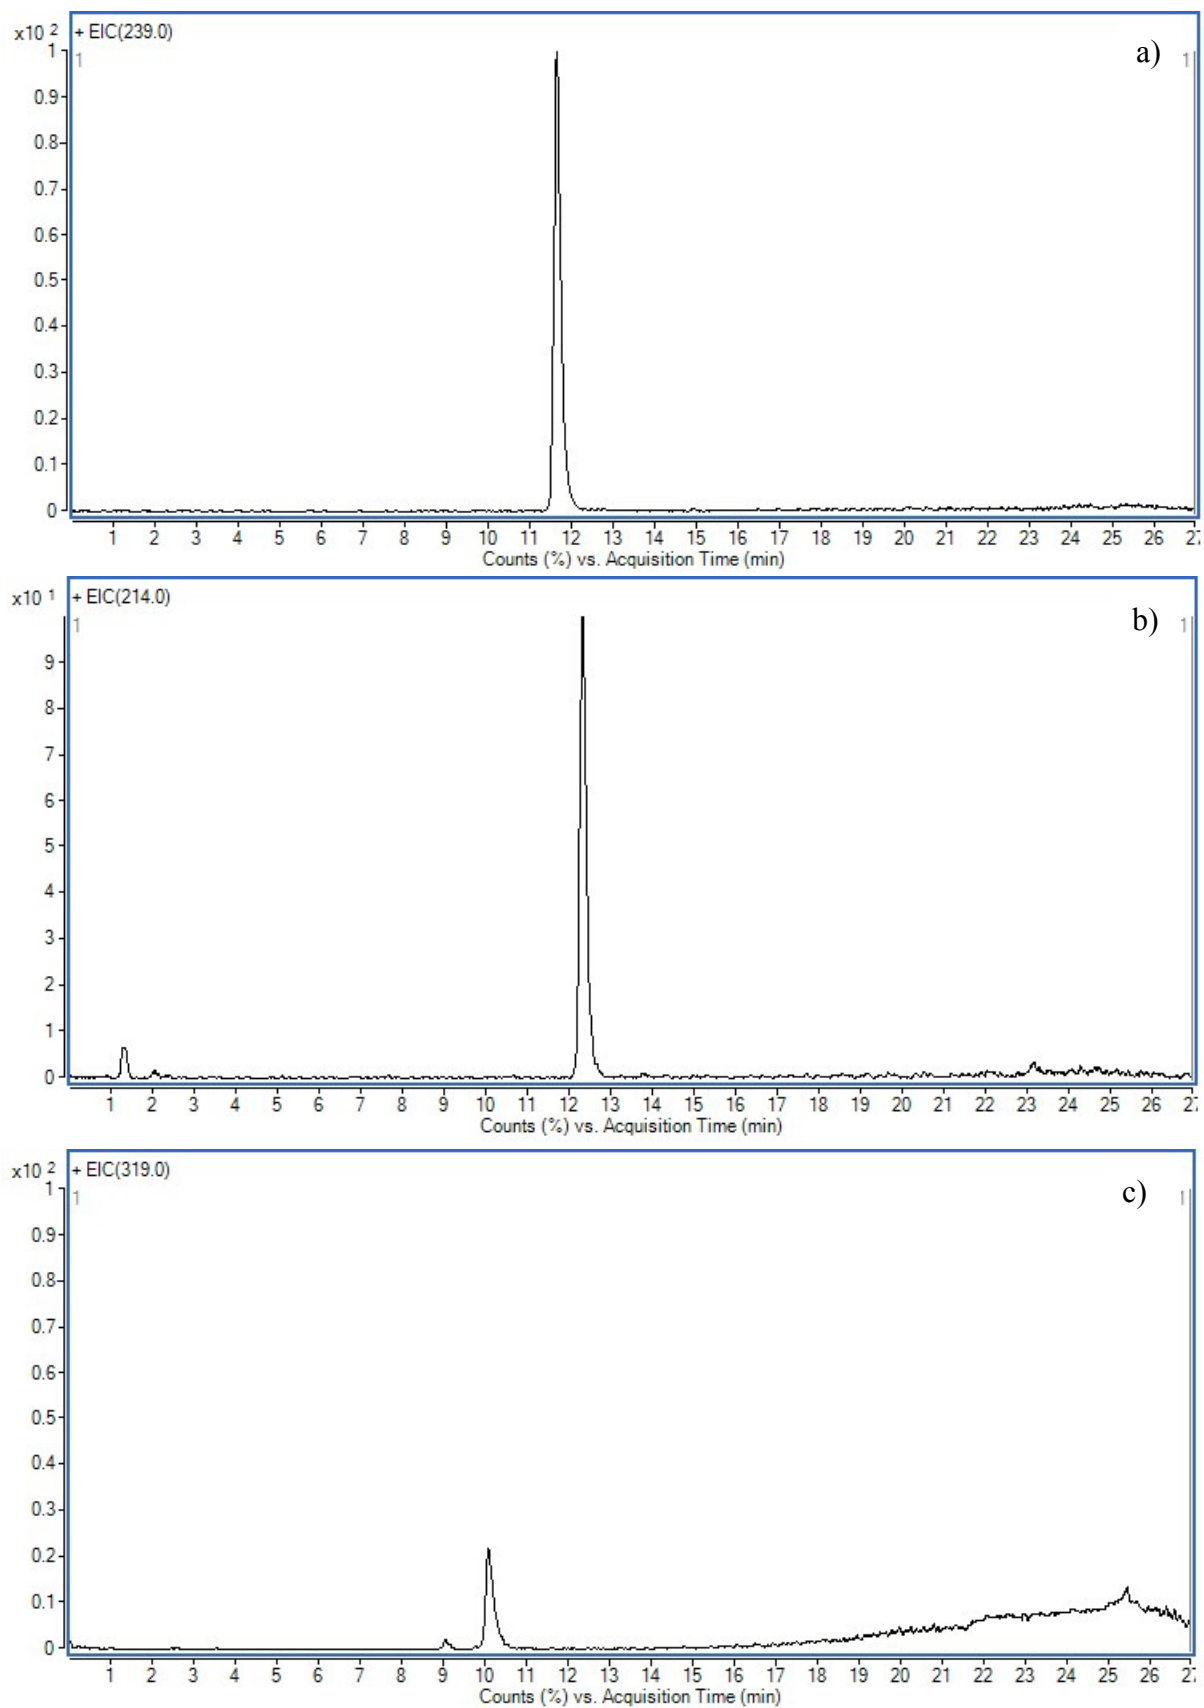

**Fig. S2** Chromatograms corresponding to NFT (a), DP-1 (b) and DP-2 (c)

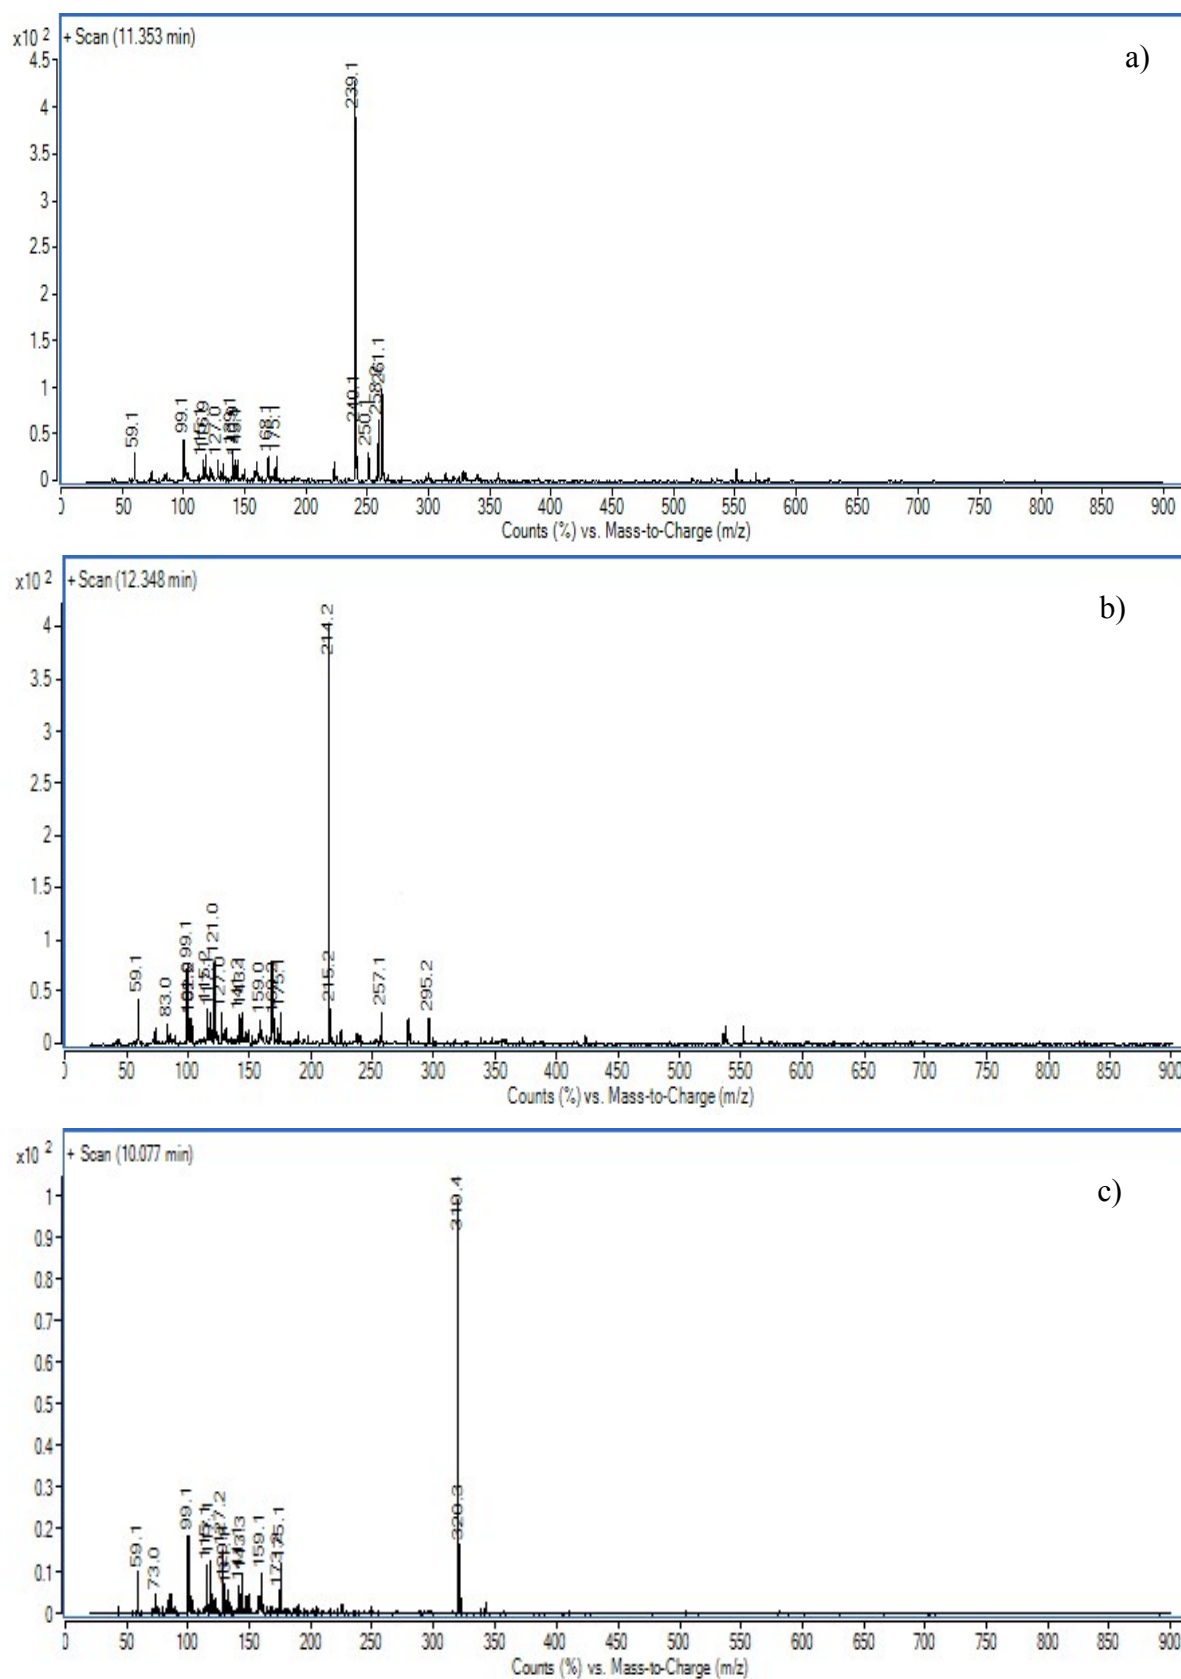

**Fig. S3** Mass spectra corresponding to NFT (a), DP-1 (b) and DP-2 (c)

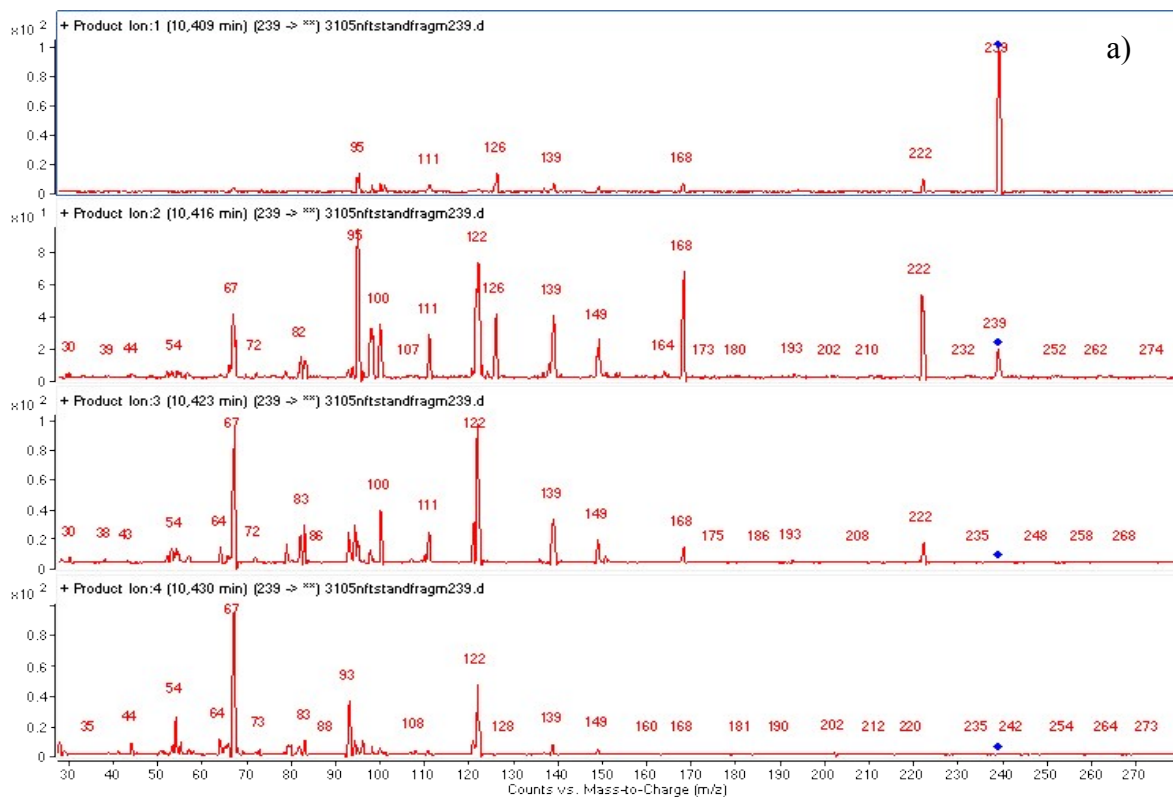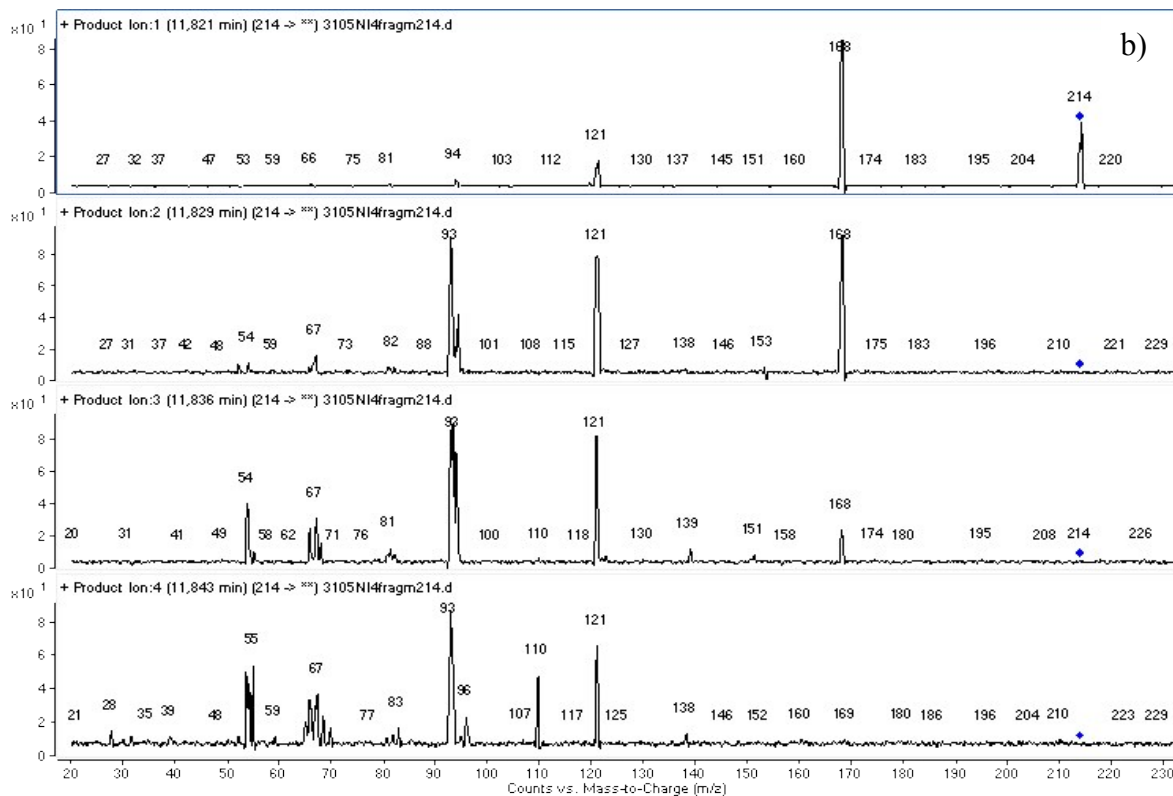

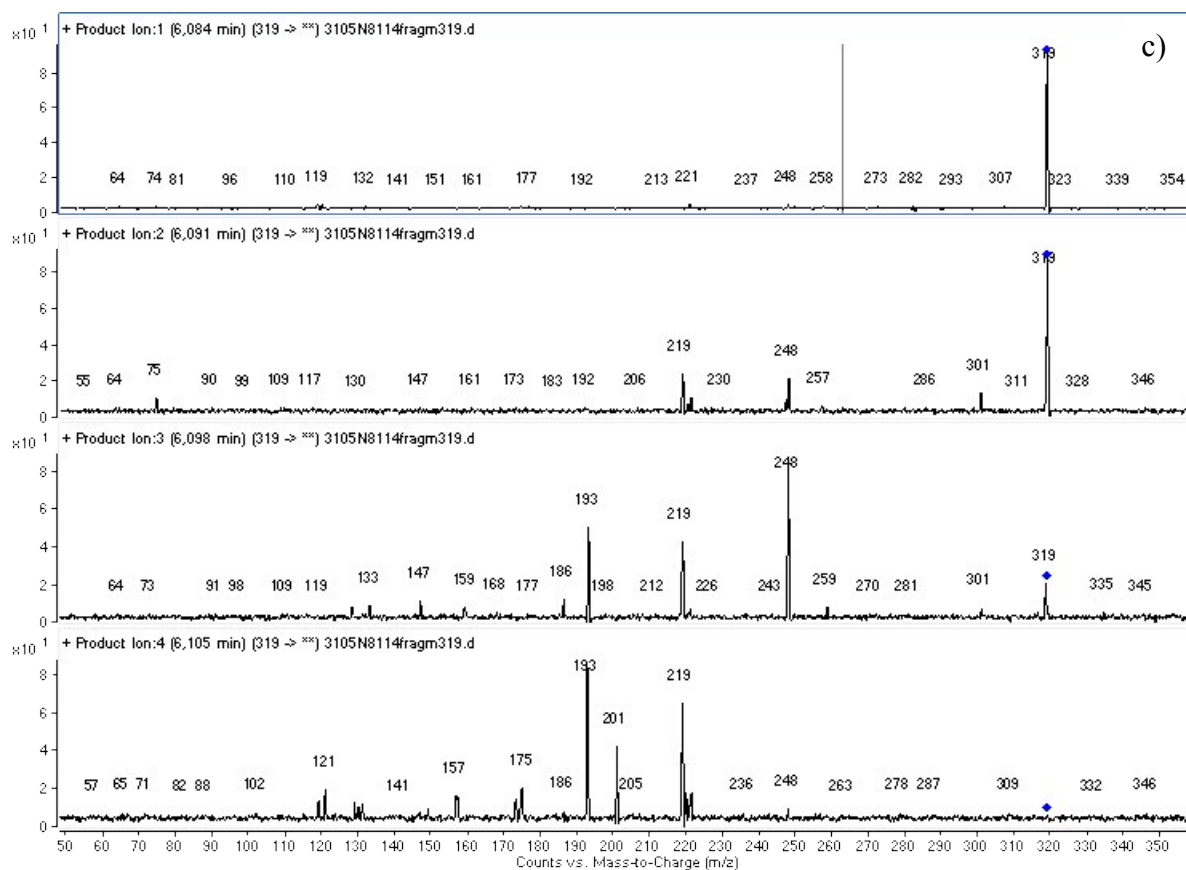

**Fig. S4** Product ion spectra obtained from ESI(+) MS/MS experiments for NFT (a), DP-1 (b) and DP-2 (c) at different values of collision energies (4 eV, 12 eV, 20 eV and 30 eV)
